# Supplementary material
Source: PubMed Central journal article supplement (PMC5970979)
Supplement: NIHMS957252-supplement-2.pdf [file NIHMS957252-supplement-2.pdf]

| Contributed Dataset |       | Age    | Ethnicity | Gender           | Hand   | Lang  | VIQ   | PIQ | FSIQ | Resection |                                                                      |
|---------------------|-------|--------|-----------|------------------|--------|-------|-------|-----|------|-----------|----------------------------------------------------------------------|
| eCOG                | units | Lesion |           |                  |        |       |       |     |      |           |                                                                      |
|                     |       |        | 28        | african-american | male   | right | left  | 83  | 70   | 75        | None                                                                 |
|                     |       |        | 51        | white            | male   | right | left  | n/a | n/a  | 74        | Left selective amygdalohippocampectomy                               |
|                     |       | NONE   | 43        | african-american | female | right | left  | n/a | n/a  | 92        | None; Candidate for Left temporal lobectomy, amygdalohippocampectomy |
|                     |       | LANG   | 28        | african-american | female | right | left  | n/a | n/a  | 86        | Left temporal lobectomy, amygdalohippocampectomy                     |
|                     |       | LANG   | 59        | white            | female | ambi  | left  | n/a | n/a  | 110       | Left temporal lobectomy, amygdalohippocampectomy                     |
|                     |       | LANG   | 34        | hispanic         | female | right | left  | 74  | 92   | 80        | Left temporal lobectomy, amygdalohippocampectomy                     |
|                     |       | LANG   | 33        | white            | male   | right | left  | n/a | n/a  | 106       | Left temporal lobectomy, amygdalohippocampectomy                     |
|                     |       | N-LANG | 29        | white            | female | right | left  | 103 | 90   | n/a       | Right temporal lobectomy, amygdalohippocampectomy                    |
|                     |       | N-LANG | 39        | hispanic         | male   | right | left  | 99  | 112  | 105       | Right temporal lobectomy, amygdalohippocampectomy                    |
|                     |       | N-LANG | 33        | white            | female | right | left  | n/a | n/a  | 94        | Right temporal lobectomy, amygdalohippocampectomy                    |
|                     |       | NONE   | 14        | white            | female | right | left  | n/a | n/a  | n/a       | None                                                                 |
|                     |       | NONE   | 22        | white            | female | left  | right | n/a | n/a  | 100       | None                                                                 |
|                     |       |        | 30        | white            | female | ambi  | bilat | 121 | 128  | 127       | Left selective amygdalohippocampectomy                               |
|                     |       |        | 36        | white            | female | right | left  | 75  | 100  | 85        | None                                                                 |
|                     |       |        | 24        | white            | female | right | left  | 99  | 105  | 102       | Right temporal lobectomy, amygdalohippocampectomy                    |
|                     |       |        | 49        | white            | female | right | left  | n/a | n/a  | 130       | Left selective amygdalohippocampectomy                               |
|                     |       |        | 44        | white            | male   | right | left  | 133 | 111  | 125       | Right anterior, inferior frontal lobe, orbitofrontal corticectomy    |
|                     |       |        | 30        | white            | female | right | left  | n/a | n/a  | 79        | Right temporal lobectomy, amygdalohippocampectomy                    |
|                     |       |        |           |                  |        |       |       |     |      |           |                                                                      |
|                     |       | LANG   | 23        | african-american | male   | right | left  | n/a | n/a  | n/a       | Left temporal lobectomy, amygdalohippocampectomy                     |
|                     |       | LANG   | 57        | white            | male   | right | left  | n/a | n/a  | n/a       | Left temporal lobectomy, amygdalohippocampectomy                     |
|                     |       | LANG   | 23        | hispanic         | male   | left  | left  | 100 | 100  | 101       | Left temporal lobectomy                                              |
|                     |       | N-LANG | 39        | african-american | female | right | left  | n/a | n/a  | 89        | Right temporal lobectomy, amygdalohippocampectomy                    |
|                     |       | N-LANG | 20        | white            | male   | right | left  | n/a | n/a  | 78        | Right temporal lobectomy, amygdalohippocampectomy                    |
|                     |       | N-LANG | 57        | white            | male   | right | left  | n/a | n/a  | 108       | Right temporal lobectomy, amygdalohippocampectomy                    |
|                     |       | NONE   | 17        | white            | male   | right | left  | n/a | n/a  | 106       | None                                                                 |
|                     |       | NONE   | 27        | indian           | male   | right | left  | n/a | n/a  | 72        | None                                                                 |

Supplementary Table 1

**Participant demographics.**

Left columns indicate which dataset(s) the participants contributed to. The anterior temporal lobectomy lesion dataset is divided between language-dominant (LANG), non-dominant (N-LANG), and non-resected (NONE). See column headers for various demographics, such as the covariate-relevant population characteristics of age, gender, and intelligence quotient. Due to the relatively small size of our participant pool we did not formally test for the effects of these covariate characteristics.
